# Supplementary material
Source: Springer Nature journal article supplement (https://www.springermedizin.de/resource/supplementary/13099_2011_42_MOESM1_ESM.pdf/9665464)

**A**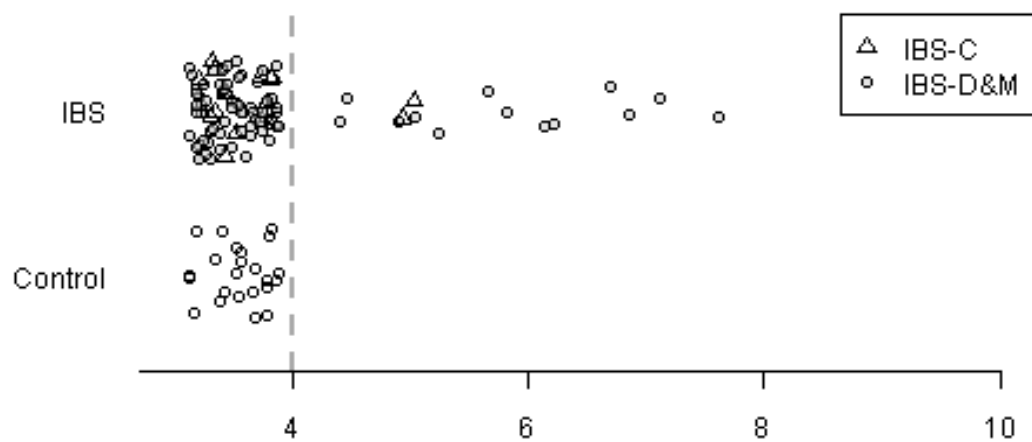**B**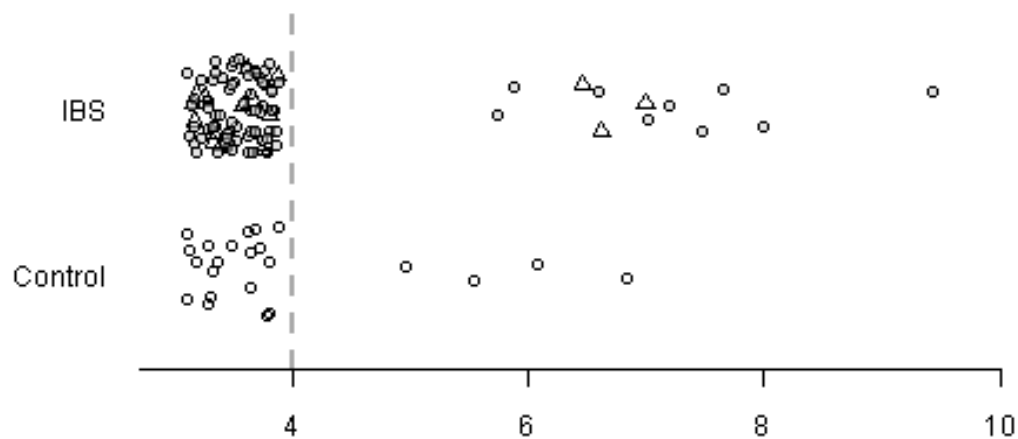

Supplement: MOESM1 [file 9665464]
